# Supplementary material for: Identifying systematic heterogeneity patterns in genetic association meta-analysis studies
Source: PLoS Genet. 2017 May 1;13(5):e1006755. doi: 10.1371/journal.pgen.1006755 (PMC5432194; doi:10.1371/journal.pgen.1006755)
Supplement: S2 Table — (XLSX) [file pgen.1006755.s011.xlsx]

## Sheet: Sheet1
S2 Table: Number of variants included in each effect size bin for 3 simulation scenarios
	scenario (no. variants)
effect size bina	50	25	10
0.04	35	13	6
0.12	8	6	2
0.2	4	3	1
0.28	2	2	1
0.4	1	1	0
aEffect sizes (beta coefficients) are scaled as loge(odds ratios), beta coefficients were sampled from a normal distribution with random error (SE = 0.1).
Each simulation scenario generates an L -shaped distribution of effect sizes.
