# Supplementary material for: Identifying systematic heterogeneity patterns in genetic association meta-analysis studies
Source: PLoS Genet. 2017 May 1;13(5):e1006755. doi: 10.1371/journal.pgen.1006755 (PMC5432194; doi:10.1371/journal.pgen.1006755)
Supplement: S9 Table — (XLSX) [file pgen.1006755.s018.xlsx]

## Sheet: Sheet1
S9 Table: Meta-regression of effect-sizes in rs2891168 and rs6689306 employing East Asian ancestry, early-age-of-disease onset and family history of CAD as covariates
rs2891168						rs6689306
Variable	β	SE(β)	p-value			Variable	β	SE(β)	p-value
East Asian ancestry	-0.00921737	0.0497081	0.853744			East Asian ancestry	0.156791	0.0396192	0.00027255
early-onset	0.0678472	0.032351	0.0417537			early-onset	0.0323791	0.0250446	0.202807
family history	0.0680219	0.0351747	0.0595823			family history	-0.0258625	0.0282077	0.364215
